# Supplementary material for: Binder-Free Three-Dimensional Porous Graphene Cathodes via Self-Assembly for High-Capacity Lithium–Oxygen Batteries
Source: MDPI journal article supplement (doi:10.3390/nano14090754), 2024-04-25
Supplement: s1 [file s1]

## Supplementary Materials

Article

# Binder-Free Three-Dimensional Porous Graphene Cathodes via Self-Assembly for High-Capacity Lithium–Oxygen Batteries

Yanna Liu <sup>1,†</sup>, Wen Meng <sup>1,3,†</sup>, Yuying Gao <sup>1</sup>, Menglong Zhao <sup>2</sup>, Ming Li <sup>2</sup> and Liang Xiao <sup>1,2,\*</sup>

<sup>1</sup> School of Chemistry, Chemical Engineering and Life Sciences, Wuhan University of Technology, Wuhan 430070, China; gaoyuying@whut.edu.cn (Y.G.)

<sup>2</sup> School of Materials Science and Engineering, Wuhan University of Technology, Wuhan 430070, China; 266648@whut.edu.cn (M.L.)

<sup>3</sup> Zhengzhou Yutong Bus Co., LTD., Zhengzhou, 450016, China

\* Correspondence: xiaoliang@whut.edu.cn (L.X.)

† These authors contributed equally to this work.

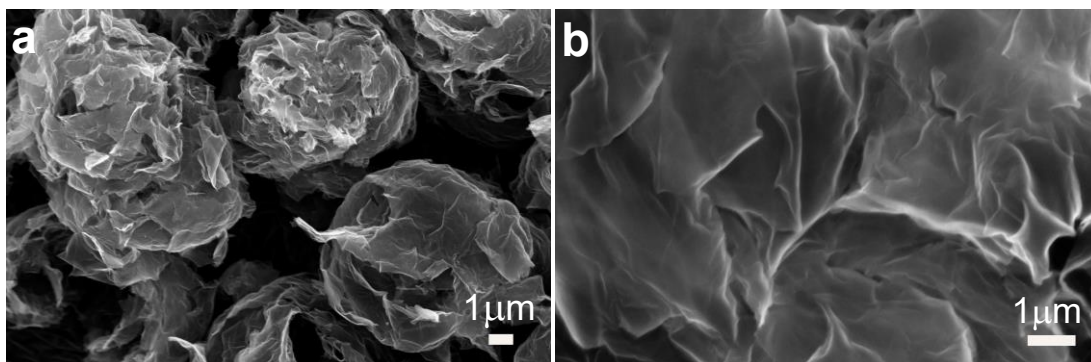

**Figure S1.** The SEM images of rGO.

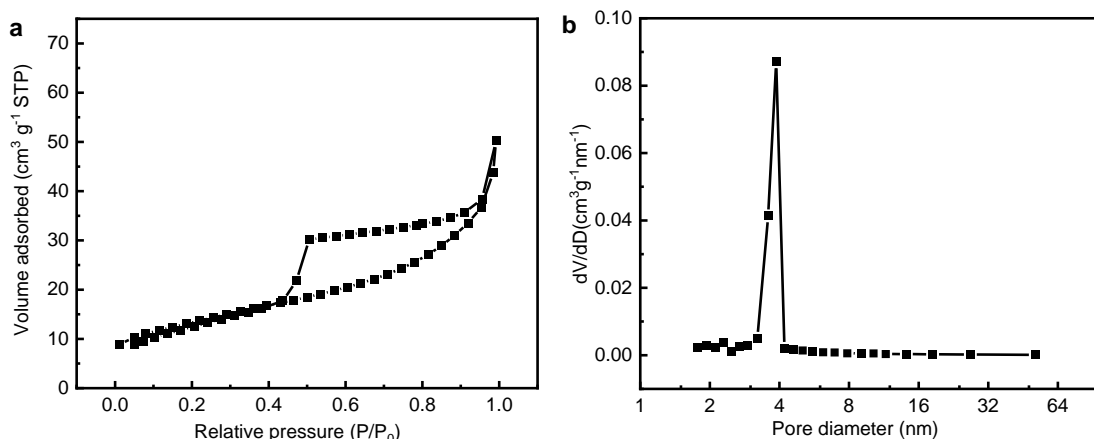

**Figure S2.** (a) The nitrogen sorption isotherm and (b) BJH pore size distribution of

PG cathode.

**Table S1.** Discharge capacity comparison of binder-free freestanding carbonaceous oxygen cathodes for LOBs.

| Materials                          | Synthesis                                                                                  | Discharge capacity (discharge rate)                                                 | Year [Reference] |
|------------------------------------|--------------------------------------------------------------------------------------------|-------------------------------------------------------------------------------------|------------------|
| 3D porous graphene                 | Self-assembling with F127 templates                                                        | 10300 mAh g <sup>-1</sup><br>(200 mA g <sup>-1</sup> ,<br>0.1 mA cm <sup>-2</sup> ) | The present work |
| Graphene foam                      | electrochemical leavening of the graphite papers                                           | 340 mAh g <sup>-1</sup><br>(100 mA g <sup>-1</sup> at the 20 <sup>th</sup> cycle)   | 2013 [1]         |
| 3D graphene aerogel                | Hydrothermal route                                                                         | 236 mAh g <sup>-1</sup><br>(50 mA g <sup>-1</sup> )                                 | 2014 [2]         |
| Graphene paper                     | vacuum-assisted technique by mixing graphene with poly(4-styrenesulfonic acid) stabilizers | 6910 mAh g <sup>-1</sup><br>(200 mA g <sup>-1</sup> )                               | 2015 [3]         |
| Graphene aerogel                   | Hydrothermal route                                                                         | 10000 mAh g <sup>-1</sup><br>(0.1 mA cm <sup>-2</sup> )                             | 2016 [4]         |
| Graphene foam                      | Carbonized melamine foam                                                                   | 3200 mAh g <sup>-1</sup><br>(100 mA g <sup>-1</sup> )                               | 2016 [5]         |
| CNTs-grafted graphene foam         | Chemical vapor deposition                                                                  | 10300 mAh g <sup>-1</sup><br>(0.1 mA cm <sup>-2</sup> )                             | 2018 [6]         |
| Freestanding carbon nanotube films | Conversion from superaligned CNT arrays                                                    | 4050 mAh g <sup>-1</sup><br>(0.1 mA cm <sup>-2</sup> )                              | 2018 [7]         |
| Graphite foam                      | polyacrylonitrile graphitization                                                           | 1.2 mAh cm <sup>-2</sup><br>(0.1 mA cm <sup>-2</sup> )                              | 2021 [8]         |
| Hierarchically porous graphene     | Al <sub>2</sub> O <sub>3</sub> hard template and CVD method                                | 6300 mAh g <sup>-1</sup><br>0.4 mA cm <sup>-2</sup>                                 | 2024 [9]         |

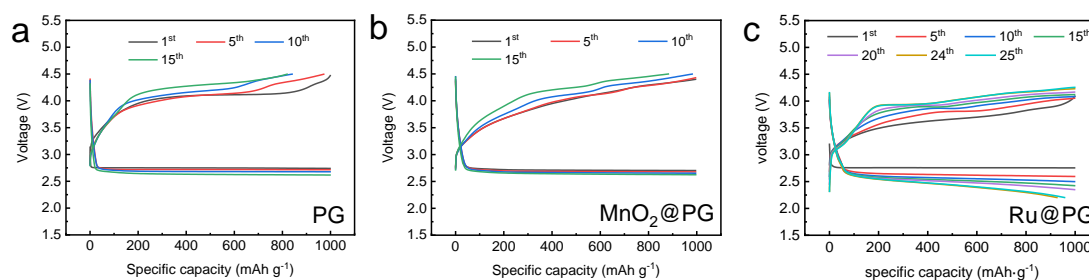

**Figure S3.** The voltages profiles of (a) PG, (b) MnO<sub>2</sub>@PG, and (c) Ru@PG at 200 mA g<sup>-1</sup> with a curtailed capacity of 1000 mAh g<sup>-1</sup>.

## References:

1. Zhang, W.; Zhu, J.; Ang, H.; Zeng, Y.; Xiao, N.; Gao, Y.; Liu, W.; Hng, H.H.; Yan, Q. Binder-free graphene foams for O<sub>2</sub> electrodes of Li–O<sub>2</sub> batteries. *Nanoscale* **2013**, *5*, 9651-9658, doi:10.1039/C3NR03321J.
2. Zhu, X.; Zhang, P.; Xu, S.; Yan, X.; Xue, Q. Free-Standing Three-Dimensional Graphene/Manganese Oxide Hybrids As Binder-Free Electrode Materials for Energy Storage Applications. *ACS Appl. Mater. Interfaces* **2014**, *6*, 11665-11674, doi:10.1021/am5024258.
3. Kim, D.Y.; Kim, M.; Kim, D.W.; Suk, J.; Park, O.O.; Kang, Y. Flexible binder-free graphene paper cathodes for high-performance Li–O<sub>2</sub> batteries. *Carbon* **2015**, *93*, 625-635, doi:https://doi.org/10.1016/j.carbon.2015.05.097.
4. Jiang, J.; He, P.; Tong, S.; Zheng, M.; Lin, Z.; Zhang, X.; Shi, Y.; Zhou, H. Ruthenium functionalized graphene aerogels with hierarchical and three-dimensional porosity as a free-standing cathode for rechargeable lithium-oxygen batteries. *NPG Asia Materials* **2016**, *8*, e239-e239, doi:10.1038/am.2015.141.
5. Zhang, P.; Wang, R.; He, M.; Lang, J.; Xu, S.; Yan, X. 3D Hierarchical Co/CoO-Graphene-Carbonized Melamine Foam as a Superior Cathode toward Long-Life Lithium Oxygen Batteries. *Adv. Funct. Mater.* **2016**, *26*, 1354-1364, doi:https://doi.org/10.1002/adfm.201503907.
6. Wan, W.; Zhu, X.; He, X.; Wang, Y.; Yan, Y.; Wu, Y.; Lü, Z. Nanoarchitected CNTs-Grafted Graphene Foam with Hierarchical Pores as a Binder-Free Cathode for Lithium-Oxygen Batteries. *J. Electrochem. Soc.* **2018**, *165*, A1741, doi:10.1149/2.1041809jes.
7. Yu, W.; Wang, H.; Qin, L.; Hu, J.; Liu, L.; Li, B.; Zhai, D.; Kang, F. Controllable Electrochemical Fabrication of KO<sub>2</sub>-Decorated Binder-Free Cathodes for Rechargeable Lithium–Oxygen Batteries. *ACS Appl. Mater. Interfaces* **2018**, *10*, 17156-17166, doi:10.1021/acsami.8b02359.
8. Yang, L.; Chen, J.; Xu, S.; Jing, N.; Hao, H.; Wang, Z.; Wang, M.; Wang, G.; Wang, G. Binder-Free Flexible Three-Dimensional Porous Electrodes by Combining Microstructures and Catalysis to Enhance the Performance of Lithium-Oxygen Batteries. *Ind. Eng. Chem. Res.* **2021**, *60*, 14113-14123, doi:10.1021/acs.iecr.1c02765.
9. Yu, W.; Shen, Z.; Yoshii, T.; Iwamura, S.; Ono, M.; Matsuda, S.; Aoki, M.; Kondo, T.; Mukai, S.R.; Nakanishi, S.; Nishihara, H. Hierarchically Porous and Minimally Stacked Graphene Cathodes for High-Performance Lithium–Oxygen Batteries. *Adv. Energy Mater.* **2024**, *14*, 2303055, doi:https://doi.org/10.1002/aenm.202303055.
